# Supplementary material for: Neuroprotective effects and mechanisms of action of nicotinamide mononucleotide (NMN) in a photoreceptor degenerative model of retinal detachment
Source: PubMed Central journal article supplement (PMC7803565; doi:10.18632/aging.202453), 2020-12-29
Supplement: aging-12-202453-s001.pdf [file aging-12-202453-s001.pdf]

**SUPPLEMENTARY FIGURES**

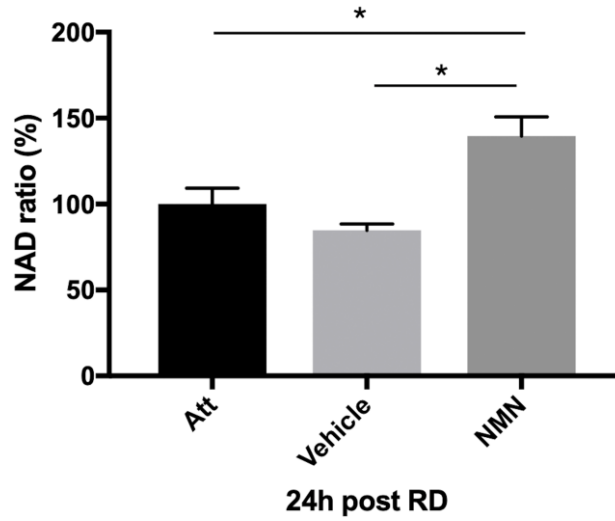

**Supplementary Figure 1. NMN administration upregulates NAD<sup>+</sup> levels in RPE/choroid complex units after retinal detachment (RD).** A tendency of decreasing NAD<sup>+</sup> levels was seen in vehicle-treated RPE/choroid compared to the attached, but no significance was found. N = 3 to 4 eyes per group. Statistical significance was analyzed with one-way ANOVA followed by Tukey-Kramer adjustments. \*p<0.05. \*\*p<0.01. \*\*\*p<0.001. Data are mean ± SEM.

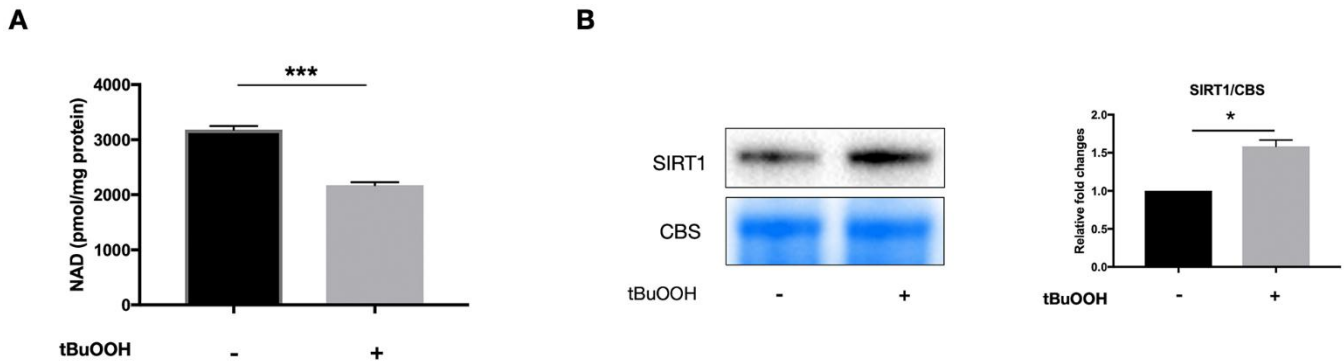

**Supplementary Figure 2. Baseline NAD<sup>+</sup> and SIRT1 level of 661W cells under oxidative stress.** (A) NAD<sup>+</sup> levels were significantly reduced in the oxidative stress model compared to control. N = 6 per group. (B) SIRT1 protein expressions were unregulated in the oxidative stress model compared to control. N = 3 per group. Statistical significance was analyzed with the unpaired Student's t-test. \*p<0.05. \*\*p<0.01. \*\*\*p<0.001. Data are mean ± SEM.
